# Supplementary material
Source: Springer Nature journal article supplement (https://www.springerprofessional.de/resource/supplementary/13638_2014_999_MOESM5_ESM.pdf/11898978)

Spatial Correlation in Antenna and beam Domains

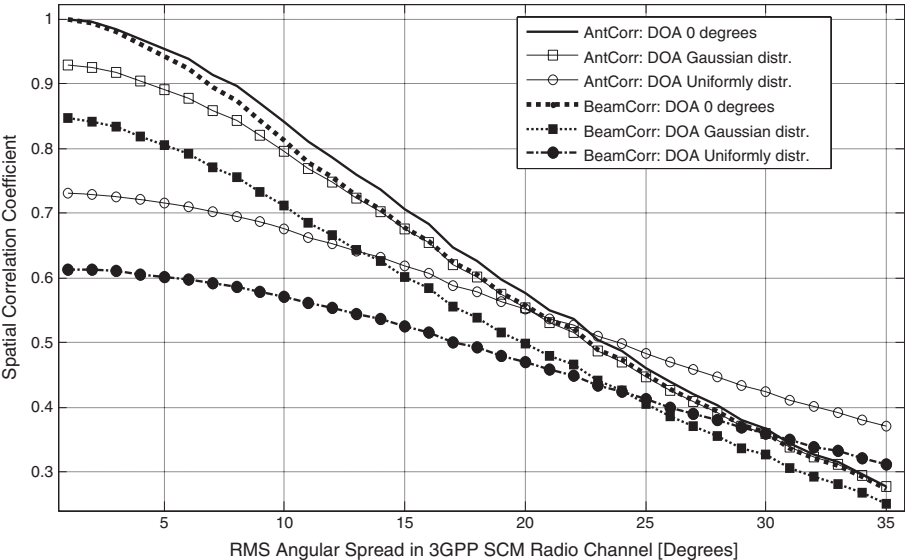

Supplement: MOESM5 [file 11898978]
